# Supplementary material for: Risk and Severity of COVID-19 and ABO Blood Group in Transcatheter Aortic Valve Patients
Source: PubMed Central journal article supplement (PMC7700222; doi:10.3390/jcm9113769), 2020-11-22
Supplement: jcm-09-03769-s001.pdf [file jcm-09-03769-s001.pdf]

**Table S1.** Clinical outcomes of patients who had undergone transcatheter aortic valve replacement according to A blood group.

| Variable                                  | Entire Cohort<br>(n = 702) | A Blood Group<br>(n = 299) | Others Blood<br>Groups<br>(n = 403) | p Value |
|-------------------------------------------|----------------------------|----------------------------|-------------------------------------|---------|
| <b>Confirmed COVID-19</b>                 | 22 (3.1)                   | 18 (6)                     | 4 (1)                               | <0.0001 |
| <b>Mortality</b>                          |                            |                            |                                     |         |
| COVID-19 mortality                        | 10 (1.5)                   | 10 (3.4)                   | 0 (0)                               | <0.0001 |
| <b>COVID-19 severity–n (%)</b>            |                            |                            |                                     |         |
| COVID-19 related hospitalization or death | 14 (2.0)                   | 12 (4.0)                   | 2 (0.5)                             | 0.001   |

Abbreviations: COVID-19: Coronavirus disease 2019.

**Table S2.** General characteristics of patients who had undergone transcatheter aortic valve replacement according to the presence or A blood group versus other groups.

| Variable                                        | Entire Cohort<br>(n = 702) | A Blood Group<br>(n = 299) | Other Blood<br>Groups<br>(n = 403) | p Value |
|-------------------------------------------------|----------------------------|----------------------------|------------------------------------|---------|
| Age, years                                      | 82.6 ± 6.9                 | 82.4 ± 7.1                 | 82.8 ± 6.9                         | 0.513   |
| Male sex–n (%)                                  | 313 (44.6)                 | 116 (38.8)                 | 197 (48.9)                         | 0.008   |
| STS score–%                                     | 5.9 ± 5.0                  | 6.0 ± 5.1                  | 5.8 ± 4.9                          | 0.645   |
| <b>Cardiovascular risk factors–n (%)</b>        |                            |                            |                                    |         |
| Current smoking                                 | 26 (3.7)                   | 8 (2.7)                    | 18 (4.5)                           | 0.214   |
| Hypertension                                    | 587 (83.6)                 | 253 (84.6)                 | 334 (82.9)                         | 0.539   |
| BMI (kg/m <sup>2</sup> )                        | 27.3 ± 5.8                 | 27.3 ± 5.8                 | 27.2 ± 5.6                         | 0.892   |
| Dyslipidemia                                    | 428 (61.0)                 | 186 (62.2)                 | 242 (56.5)                         | 0.562   |
| Diabetes                                        | 213 (30.3)                 | 97 (32.4)                  | 116 (28.8)                         | 0.297   |
| <b>Comorbidities–n (%)</b>                      |                            |                            |                                    |         |
| Coronary artery disease                         | 318 (45.3)                 | 146 (48.8)                 | 172 (42.7)                         | 0.106   |
| Congestive heart failure                        | 252 (35.9)                 | 107 (35.8)                 | 145 (36.0)                         | 0.958   |
| Stroke                                          | 98 (14.0)                  | 40 (13.4)                  | 58 (14.4)                          | 0.701   |
| Atrial fibrillation                             | 283 (40.3)                 | 121 (40.5)                 | 162 (40.2)                         | 0.943   |
| COPD                                            | 82 (11.7)                  | 36 (12.1)                  | 46 (11.4)                          | 0.786   |
| Prior cancer                                    | 187 (26.6)                 | 82 (27.4)                  | 105 (26.1)                         | 0.685   |
| CKD (Creatinine levels > 130 mol/L)             | 102 (14.6)                 | 50 (16.8)                  | 52 (12.9)                          | 0.150   |
| Peripheral arterial disease                     | 191 (27.2)                 | 84 (28.1)                  | 107 (26.6)                         | 0.650   |
| <b>Blood Type–n (%)</b>                         |                            |                            |                                    |         |
|                                                 | 299 (42.6)                 | 299 (100)                  | 0 (0)                              |         |
| A                                               | 63 (9.0)                   | 0 (0)                      | 63 (15.6)                          | <0.0001 |
| B                                               | 20 (2.8)                   | 0 (0)                      | 20 (5.0)                           |         |
| AB                                              |                            |                            |                                    |         |
| O                                               | 320 (45.6)                 | 0 (0)                      | 320 (79.4)                         |         |
| <b>Treatment at the time of follow up–n (%)</b> |                            |                            |                                    |         |
| Aspirin                                         | 365 (53.3)                 | 163 (54.9)                 | 202 (52.1)                         | 0.463   |
| P2Y12 inhibitors                                | 44 (6.3)                   | 19 (6.4)                   | 25 (6.2)                           | 0.935   |
| VKA                                             | 144 (21.0)                 | 58 (19.5)                  | 86 (22.2)                          | 0.401   |
| DOAC                                            | 175 (25.5)                 | 78 (26.3)                  | 97 (25.0)                          | 0.707   |
| ACE-i/ARB                                       | 335 (48.9)                 | 152 (51.2)                 | 183 (47.2)                         | 0.298   |
| Statins                                         | 344 (50.2)                 | 156 (52.5)                 | 188 (48.5)                         | 0.291   |

Data are given as means  $\pm$  standard deviations or counts (percentages). Abbreviations: ACE-i, angiotensin converting enzyme inhibitors; ARB, angiotensin receptor blockers; BMI: Body mass index; CKD, chronic kidney disease; COPD, chronic obstructive pulmonary disease; COVID-19, coronavirus disease 2019; DOAC, direct oral anticoagulants; STS, Society of Thoracic Surgeons; VKA, vitamin K antagonist.
